# Supplementary material for: UPLC-Q-TOF/MS-Based Metabolomics Approach to Reveal the Hepatotoxicity of Emodin and Detoxification of Dihydromyricetin
Source: PubMed Central journal article supplement — ACS Omega. 2021 Feb 19;6(8):5348–58. doi: 10.1021/acsomega.0c05488 (PMC7931181; doi:10.1021/acsomega.0c05488), 2021-02-19
Supplement: ao0c05488_si_001.pdf [file ao0c05488_si_001.pdf]

# **UPLC-Q-TOF/MS based Metabolomics Approach to reveal the hepatotoxicity of emodin and detoxification of Dihydromyricetin**

Jian Gao<sup>#1,2</sup>, Ning Shi<sup>#3</sup>, Hongju Guo<sup>3</sup>, Junfeng Gao<sup>2</sup>, Xu Tang<sup>2</sup>, Siyuan Yuan<sup>2</sup>, Jiahui Qian<sup>1</sup>, Binyu Wen<sup>\*2</sup>

1. Beijing University of Chinese Medicine, Beijing, 100029, P.R.China

2. Dongfang Hospital, Beijing University of Chinese Medicine, Beijing, 100078, P.R.China

3. Pharmaceutical Department of Characteristic Medical Center, Strategic Support Force, Beijing, 100101, P.R.China

#These authors contributed equally to this work.

\*Correspondence: Binyu Wen E-mail: wen-binyu@163.com

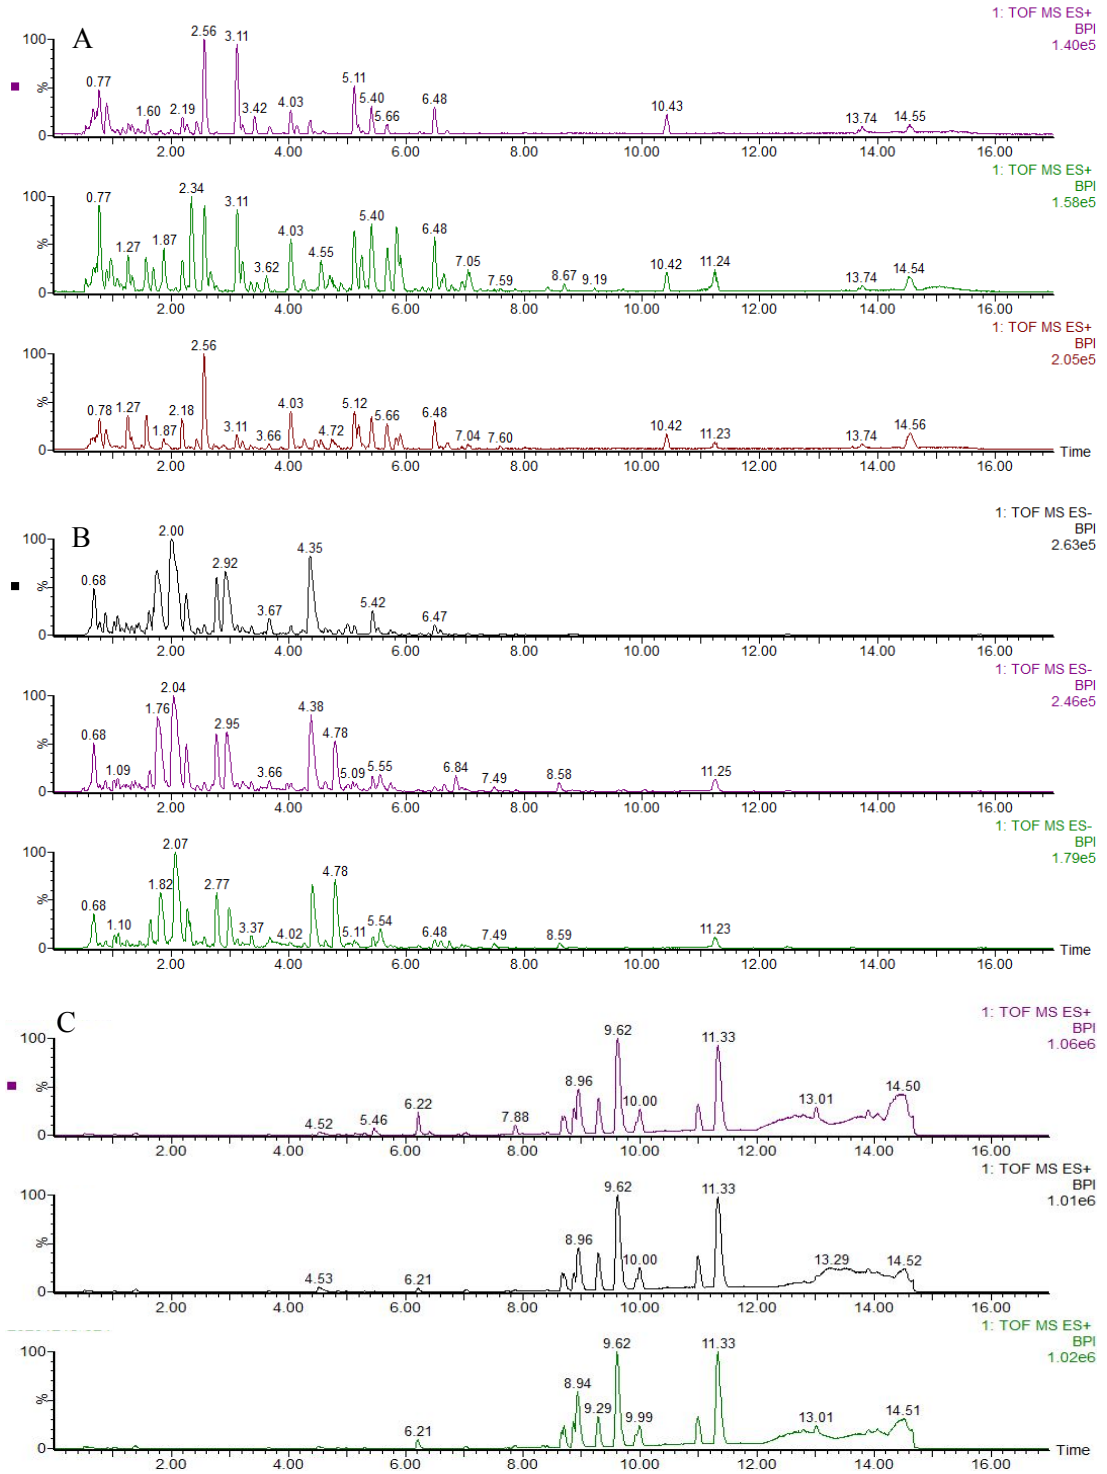

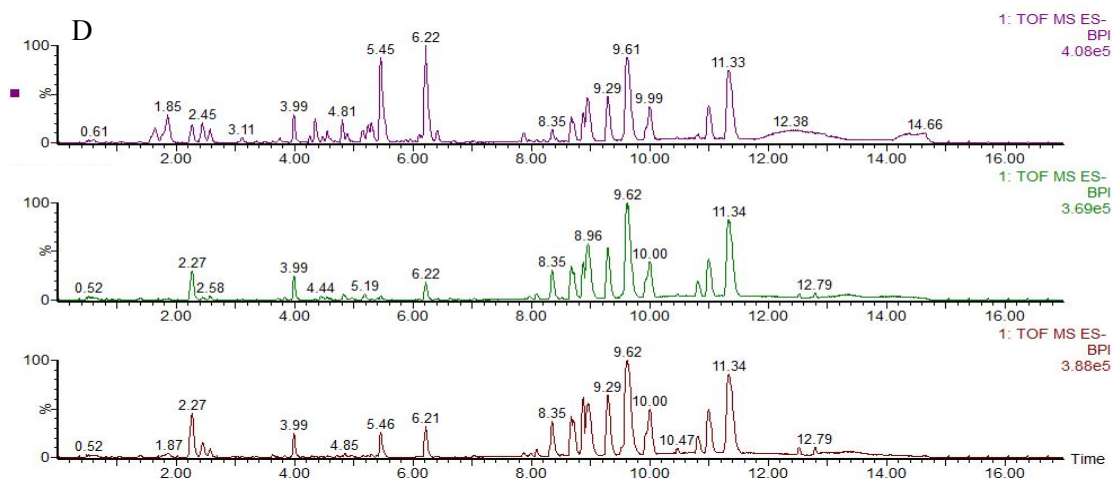

**Figure S1.** UPLC-Q-TOF-MS representative base peak intensity(BPI) chromatogram of the positive and negative ions in urine and serum samples

The peaks were acquired via analyses of urine and serum samples of different groups in urine ESI<sup>+</sup> (A), urine ESI<sup>-</sup> (B) modes, serum ESI<sup>+</sup> (C) and serum ESI<sup>-</sup> (D) modes. ESI<sup>+</sup> and ESI<sup>-</sup> from top to bottom show the Con group, emodin group, and emodin+DMY group.
